# Supplementary material
Source: Springer Nature journal article supplement (https://www.springermedizin.de/resource/supplementary/12879_2011_1699_MOESM11_ESM.pdf/9443266)

**Rv2032**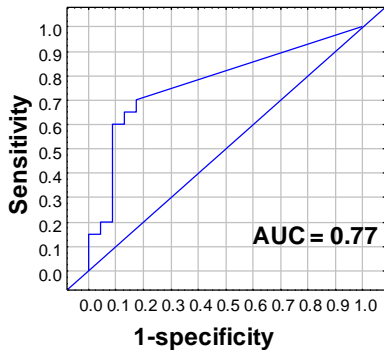**Rv2625c**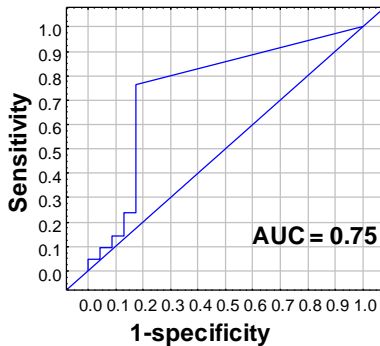**Rv1996**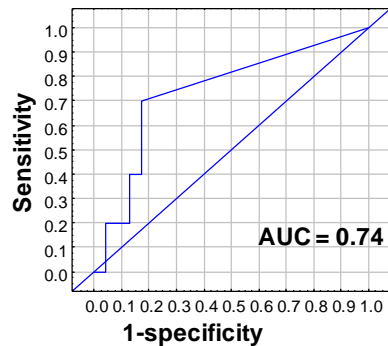**Rv0081**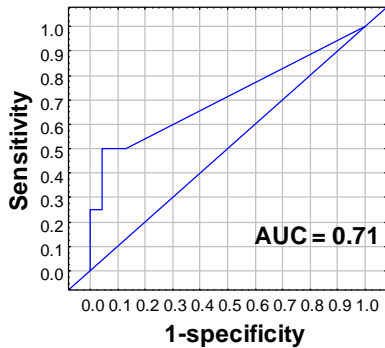**Rv2624c**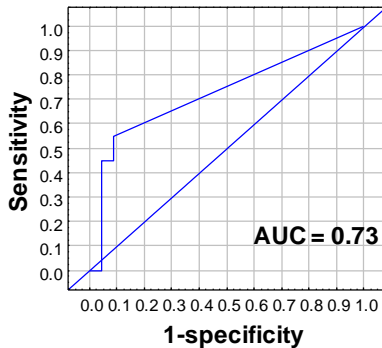

Supplement: MOESM11 [file 9443266]
